# Supplementary material for: Rapid and sensitive detection of vanillylmandelic acid based on a luminescent fourteen-metal Tb(iii) planar nanocluster
Source: Royal Society of Chemistry journal article supplement (doi:10.1039/d4cc03667k), 2024-01-01
Supplement: d4cc03667k1.pdf [file d4cc03667k1.pdf]

## Supporting Information

### **Rapid and sensitive detection of vanillylmandelic acid based on a luminescent fourteen-metal Tb(III) planar nanocluster**

Yanheng Meng, Shiqing Wang, Xiaoli Lv, Xianfeng Huang, Weibin Zhang, Xiaojun Wu, Desmond Schipper, and Xiaoping Yang

## **Contents**

|                                                                           |    |
|---------------------------------------------------------------------------|----|
| 1. General procedures.....                                                | 2  |
| 2. Synthesis of H <sub>2</sub> L and <b>1</b> .....                       | 3  |
| 3. <sup>1</sup> H NMR spectrum of H <sub>2</sub> L.....                   | 4  |
| 4. IR spectra of H <sub>2</sub> L and <b>1</b> .....                      | 4  |
| 5. Coordination modes of Tb(III) ions with ligands.....                   | 5  |
| 6. The thermogravimetric analysis of <b>1</b> .....                       | 5  |
| 7. UV-vis absorption spectra of H <sub>2</sub> L, <b>1</b> and VMA.....   | 6  |
| 8. Excitation and emission spectra of H <sub>2</sub> L and <b>1</b> ..... | 6  |
| 9. The lanthanide luminescence lifetimes of <b>1</b> .....                | 7  |
| 10. The lanthanide luminescence spectra of <b>1</b> .....                 | 7  |
| 11. Chemical structures of urinary components.....                        | 8  |
| 12. The luminescence response of <b>1</b> to urinary components.....      | 9  |
| 13. The luminescence response of <b>1</b> to VMA in urine and FCS.....    | 12 |
| 14. Powder XRD patterns of <b>1</b> .....                                 | 12 |
| 15. UV-vis titration of <b>1</b> to the addition of VMA.....              | 13 |
| 16. The emission spectrum of VMA at 77K.....                              | 13 |
| 17. UV-vis absorption spectra of VMA and urinary components.....          | 14 |
| 18. X-Ray Crystallography.....                                            | 15 |

### **1. General procedures**

The metal salt is purchased from Meryer Company, and the reagent is from

Wenzhou Jinshan Chemical Reagent. NMR spectra were obtained on an AVANCE III AV500 at 298 K. IR spectra were determined on a FTIR-650 spectrometer. Powder XRD spectra were recorded on a D8 Advance. The thermogravimetric analyses were carried out on a Perking Elmer Diamond TG-DTA spectrum GX. The flow rate of N<sub>2</sub> is 200 ml min<sup>-1</sup>, the temperature is heated from room temperature to 800 degrees, and the speed is 10°C min<sup>-1</sup>. Elemental analyses were carried out on a EURO EA3000 with the solid sample after dried in the oven at 110°C for overnight. Field emission scanning electron microscopy (FESEM) images were recorded on a Nova NanoSEM 200 scanning electron microscope.

**Photophysical Studies.** UV-vis absorption spectra were obtained on a UV-3600 spectrophotometer; Excitation and emission spectra on a FLS 980 fluorimeter. The light source for the spectra was a 450 W xenon arc lamp with continuous spectral distribution from 190 to 2600 nm. Liquid nitrogen cooled Ge PIN diode detector was used to detect the NIR emissions from 800 nm to 1700 nm. The temporal decay curves of the fluorescence signals were stored by using the attached storage digital oscilloscope. Systematic errors have been deducted through the standard instrument corrections. All the measurements were carried out at room temperature.

## 2. Synthesis of H<sub>2</sub>L and 1

**Synthesis of H<sub>2</sub>L:** 3-methoxysalicylaldehyde (20 mmol, 3.0430 g) was dissolved in 50 mL EtOH, and a solution of 1,3-diaminopentane (10 mmol, 1.0218 g) in 25 mL EtOH was then added drop by drop. The resulting solution was stirred and heated under reflux

for 5 hours. It was allowed to cool and then filtered in vacuum. The solid was washed with EtOH ( $3 \times 5$  mL) and then dried under vacuum to give yellow product. Yield: 3.0138 g (81.35%).  $^1\text{H NMR}$  (500 MHz, Chloroform- $d$ )  $\delta$  14.08 (s, 1H), 13.99 (s, 1H), 8.33 (s, 1H), 8.29 (s, 1H), 6.94 (s, 2H), 6.88 (s, 2H), 6.81 (s, 2H), 3.92 (s, 6H), 3.60 (s, 2H), 3.32 (s, 1H), 2.01 (s, 2H), 1.69 (s, 2H), 0.88 (s, 3H). IR (KBr,  $\text{cm}^{-1}$ ): 3465 (m), 3367 (s), 2935 (s), 2857 (w), 1607 (s), 1503 (s), 1460 (s), 1388 (m), 1345 (w), 1276 (s), 1227 (s), 1170 (w), 1142 (w), 1074 (m), 1040 (m), 994 (s), 896 (m), 779 (w), 723 (s), 606 (w).

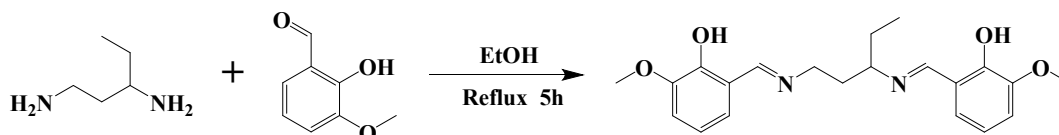

**Scheme S1.** The synthesis route of  $\text{H}_2\text{L}$ .

**Synthesis of 1:** At room temperature, 3-methoxysalicylaldehyde (0.20 mmol, 3.043 g) and  $\text{H}_2\text{L}$  (0.20 mmol, 0.074 g) were dissolved in 8 mL EtOH and 4 mL MeOH, and then triethylamine in EtOH (1.0 mol/L, 1 ml) was added into the solution.  $\text{Tb}(\text{OAc})_3 \cdot 6\text{H}_2\text{O}$  (0.20 mmol, 0.0888 g) was added into the above solution, and the mixture was heated for 30 mins under reflux with stirring, and cooled to room temperature. The clear solution was obtained by filtered, and slow diffusion of diethyl ether into the solution for two weeks gave the yellow crystalline product of **1**. Yield (based on  $\text{Tb}(\text{OAc})_3 \cdot 6\text{H}_2\text{O}$ ): 22% (0.01644 g). Elemental analysis: Calcd for  $\text{C}_{114}\text{H}_{146}\text{N}_4\text{O}_{82}\text{Tb}_{14}$ : C, 26.80; H, 2.88; N, 1.10 %. Found: C, 26.57; H, 2.68; N, 1.25 %. IR (KBr,  $\text{cm}^{-1}$ ): 1646 (m), 1552(s), 1444 (s), 1404 (s), 1342 (m), 1317 (m), 1242 (m), 1211 (s), 1170 (w), 1071 (w), 1016 (m), 949 (m), 860 (w), 727 (s), 674 (s), 645 (m), 612 (m), 555 (w). m. p.  $> 210$  °C (decompose).

### 3. $^1\text{H NMR}$ spectrum of $\text{H}_2\text{L}$

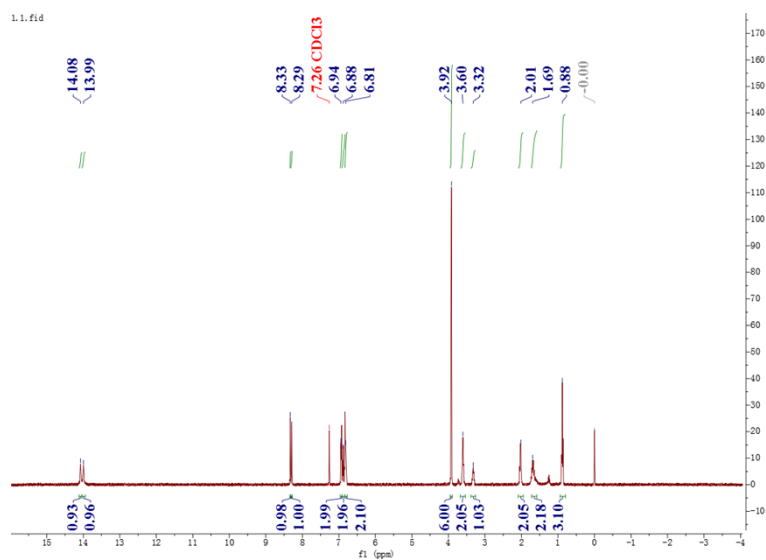

Figure S1. The  $^1\text{H}$  NMR spectrum of  $\text{H}_2\text{L}$ .

#### 4. IR spectra of $\text{H}_2\text{L}$ and **1**

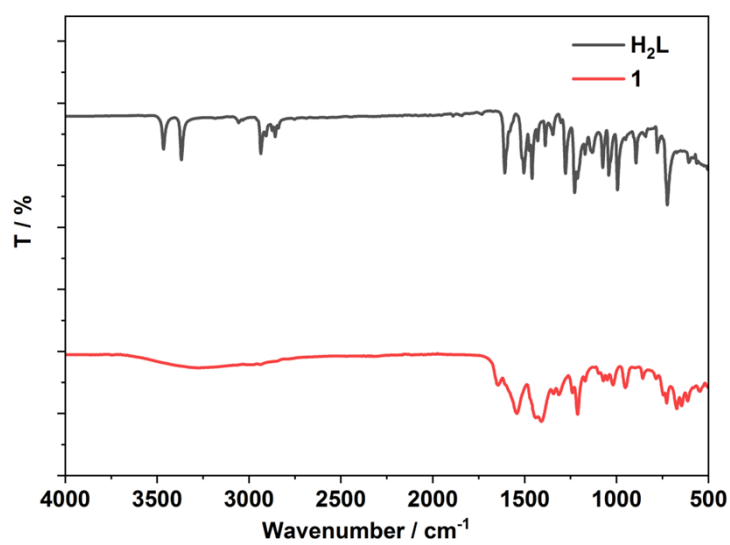

Figure S2. IR spectra of the ligand  $\text{H}_2\text{L}$  and **1**.

#### 5. Coordination modes of $\text{Tb}(\text{III})$ ions with ligands

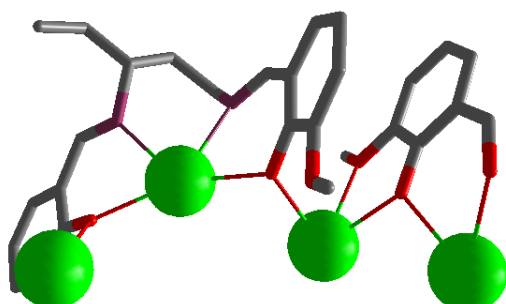

**Figure S3.** Coordination modes of Tb(III) ions with ligands in **1**.

## 6. The thermogravimetric analysis of **1**

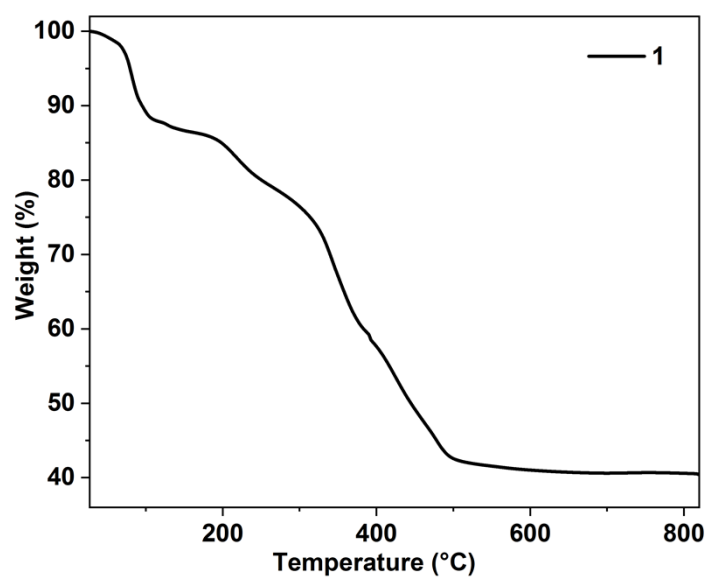

**Figure S4.** The thermogravimetric analysis of **1**.

## 7. UV-vis absorption spectra of H<sub>2</sub>L, **1** and VMA

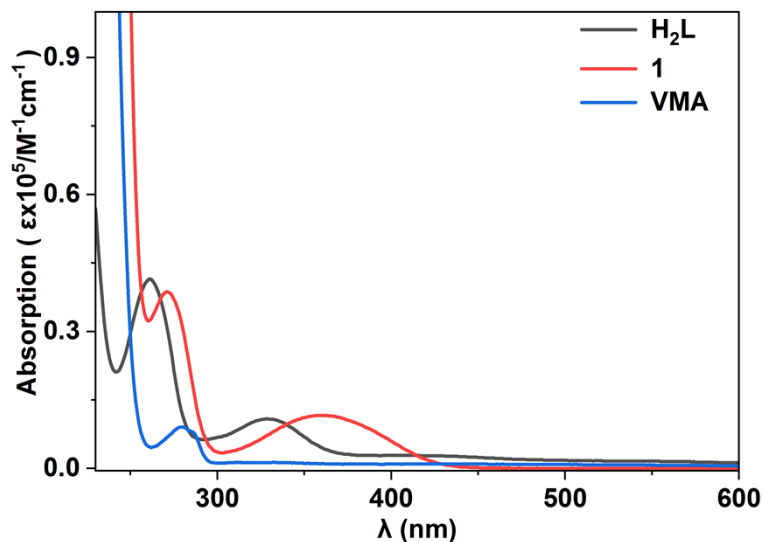

**Figure S5.** UV-vis absorption spectra of H<sub>2</sub>L, **1** and VMA in CH<sub>3</sub>CN. (*c* = 10 μM)

## 8. Excitation and emission spectra of H<sub>2</sub>L and **1**

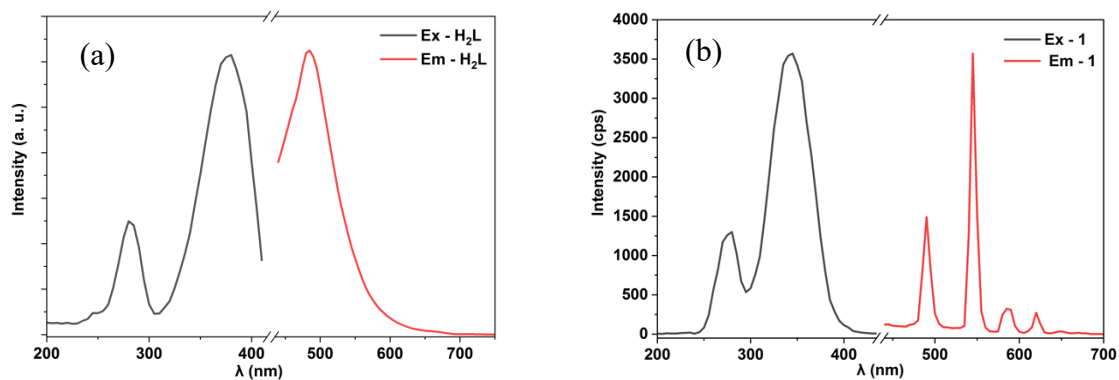

**Figure S6.** (a) Excitation ( $\lambda_{em} = 485$  nm) and emission ( $\lambda_{ex} = 380$  nm) spectra of H<sub>2</sub>L (10 μM) in CH<sub>3</sub>CN. (b) Excitation ( $\lambda_{em} = 545$  nm) and emission ( $\lambda_{ex} = 345$  nm) spectra of **1** (10 μM) at room temperature in CH<sub>3</sub>CN.

## 9. The lanthanide luminescence lifetimes of **1**

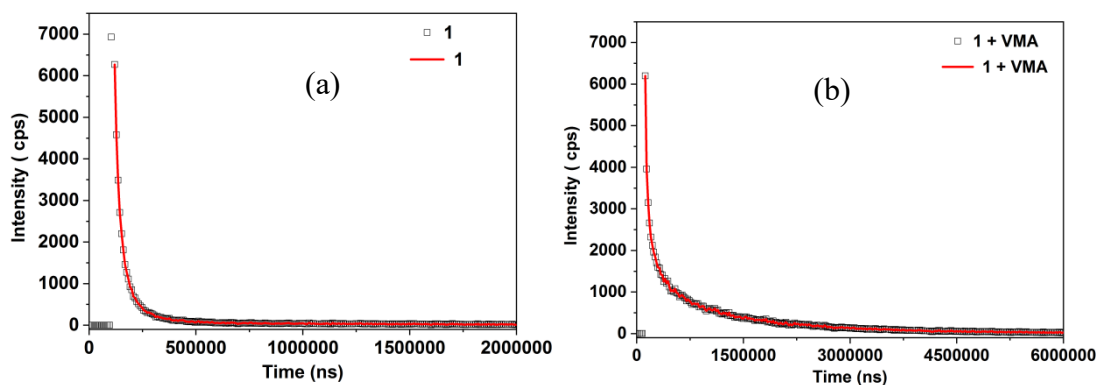

**Figure S7.** The lanthanide luminescence lifetimes of **1** (10  $\mu\text{M}$ ) without (a) and with (b) the addition of VMA (270  $\mu\text{M}$ ) in  $\text{CH}_3\text{CN}$ . ( $\lambda_{\text{ex}} = 285 \text{ nm}$ )

## 10. The lanthanide luminescence spectra of **1**

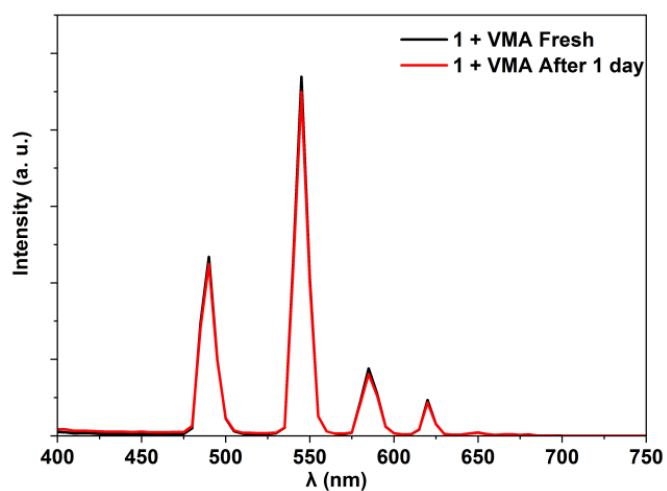

**Figure S8.** The lanthanide luminescence spectra (fresh and one day after) of **1** (10  $\mu\text{M}$ ) with the addition of VMA (270  $\mu\text{M}$ ). ( $\lambda_{\text{ex}} = 285 \text{ nm}$ )

## 11. Chemical structures of urinary components

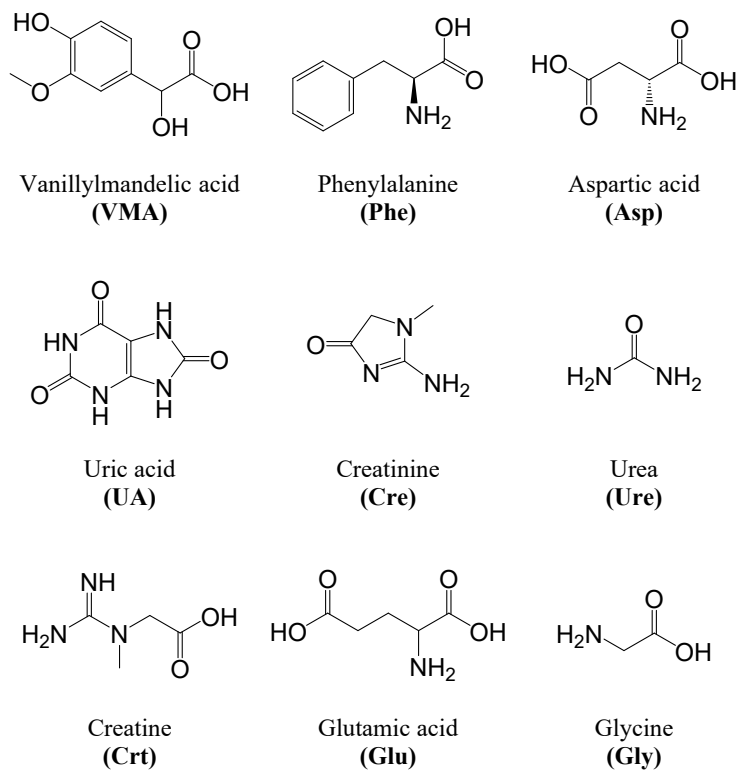

**Scheme S2.** Chemical structures of urinary components.

## 12. The luminescence response of 1 to urinary components

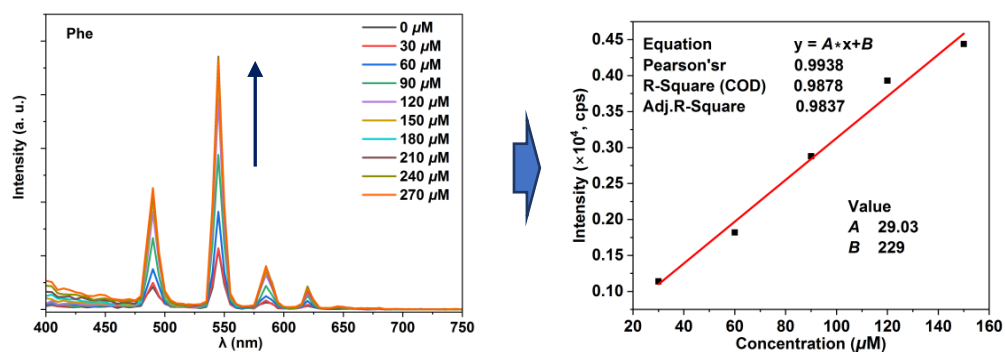



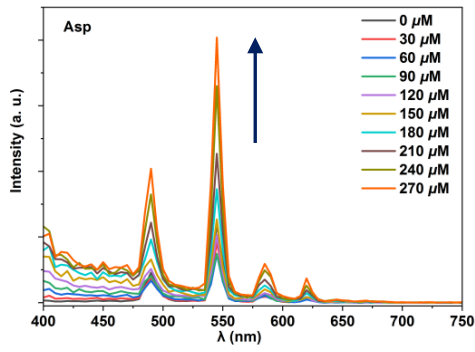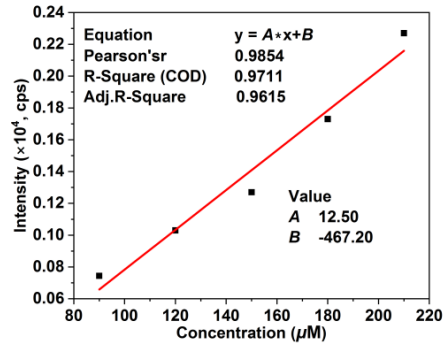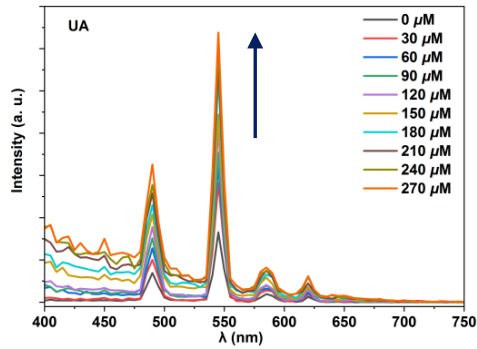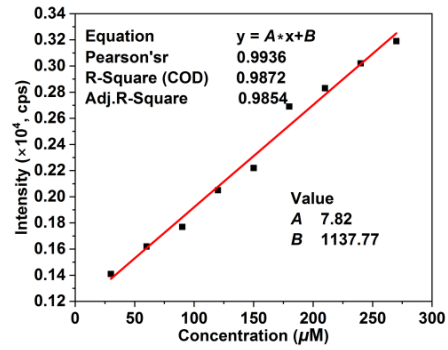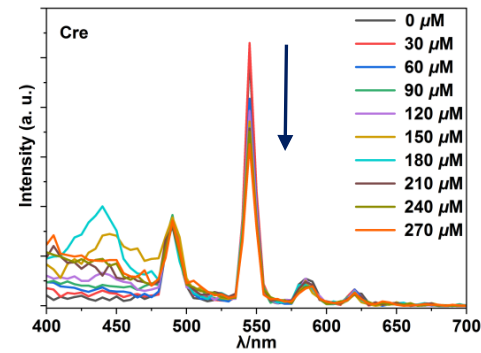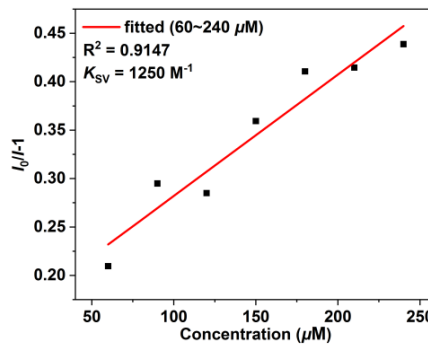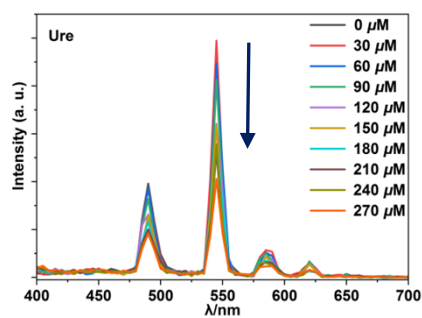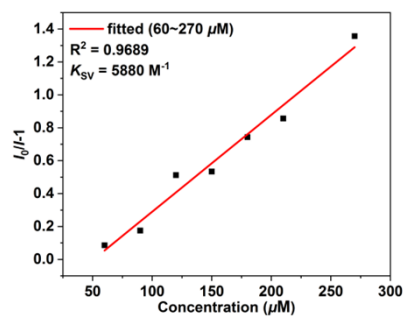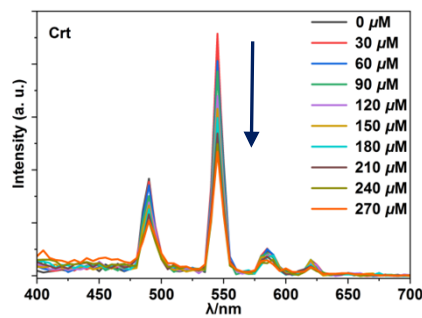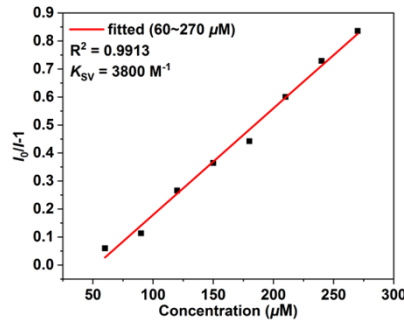

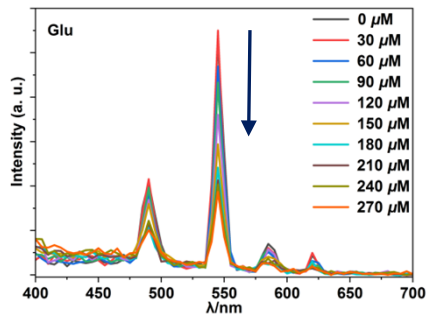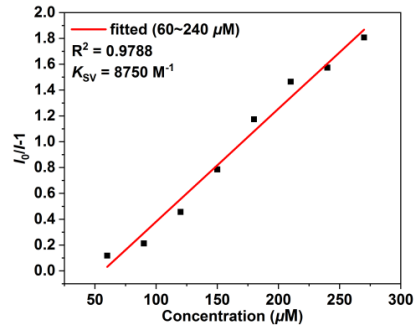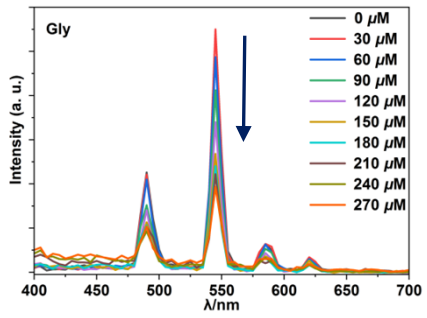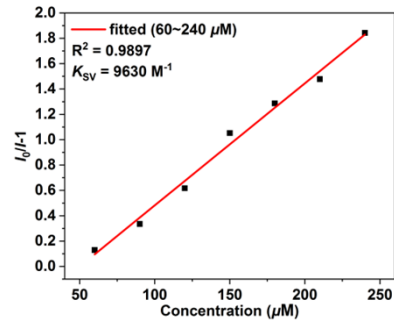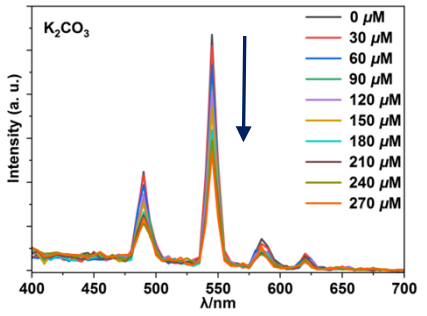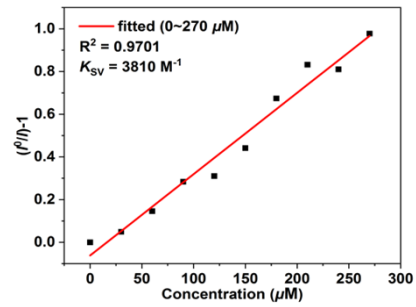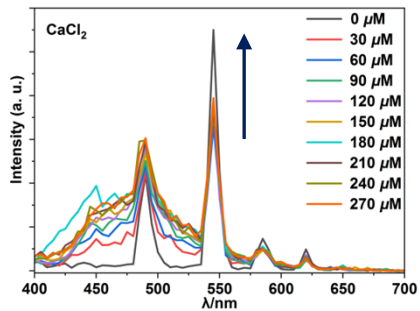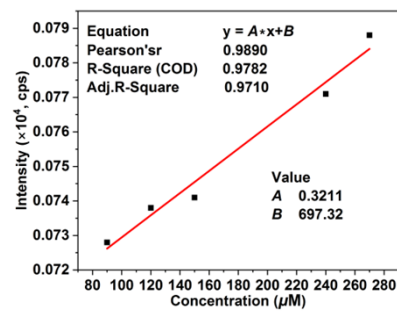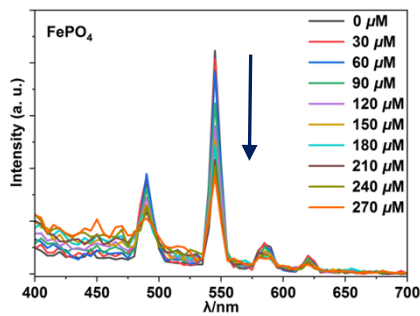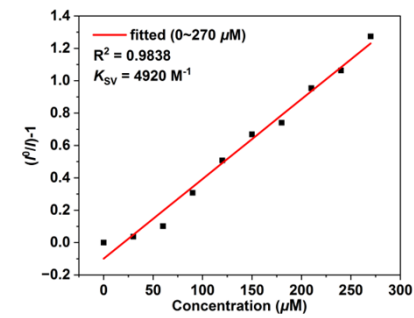

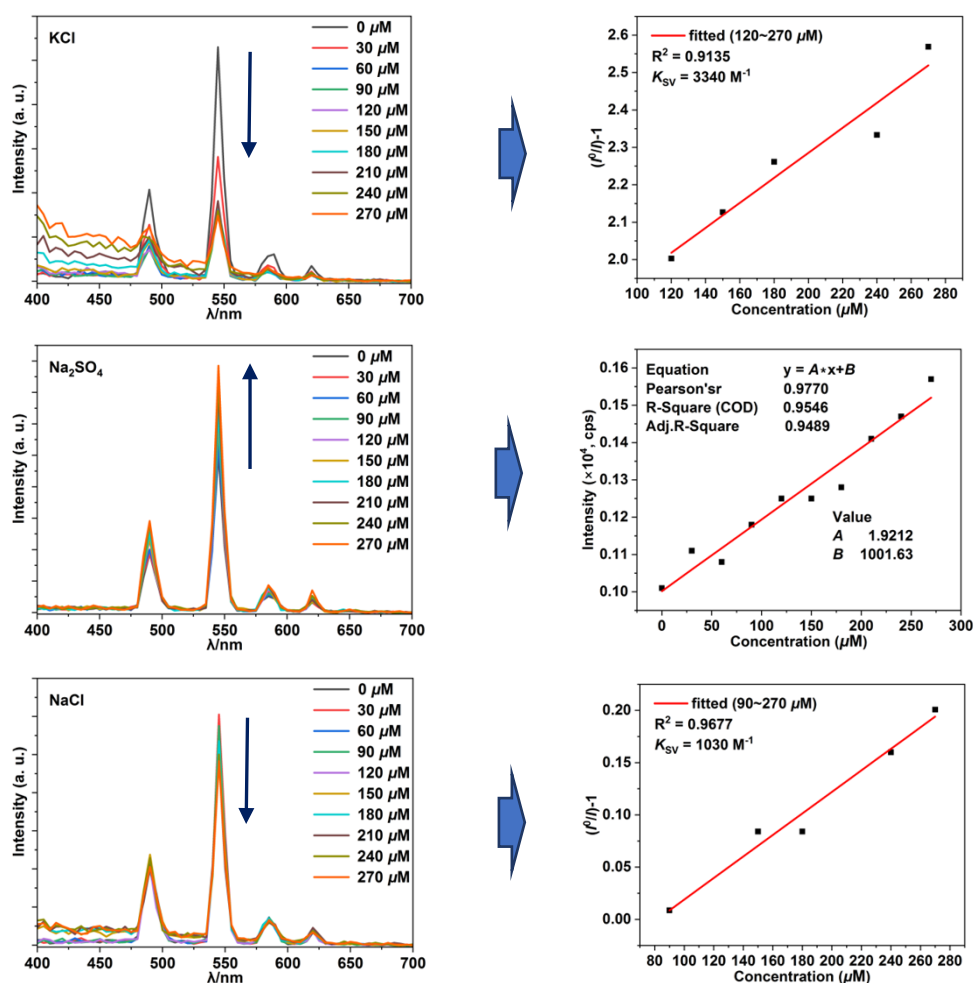

**Figure S9.** Luminescence spectra of **1** ( $10 \mu\text{M}$ ) with the addition of urinary components in  $\text{CH}_3\text{CN}$ . ( $\lambda_{\text{ex}} = 285 \text{ nm}$ )

### 13. The luminescence response of **1** to VMA in urine and FCS

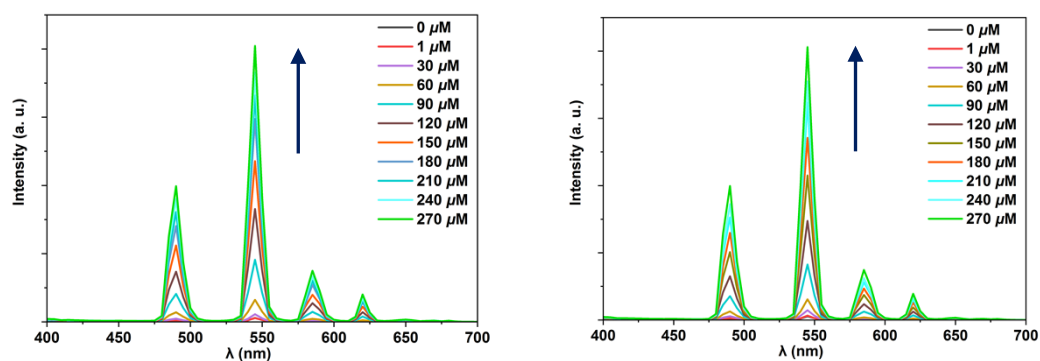

**Figure S10.** The luminescence spectra of **1** ( $10 \mu\text{M}$ ) with the addition of VMA in FCS and urine. ( $\lambda_{\text{ex}} = 285 \text{ nm}$ )

## 14. Powder XRD patterns of **1**

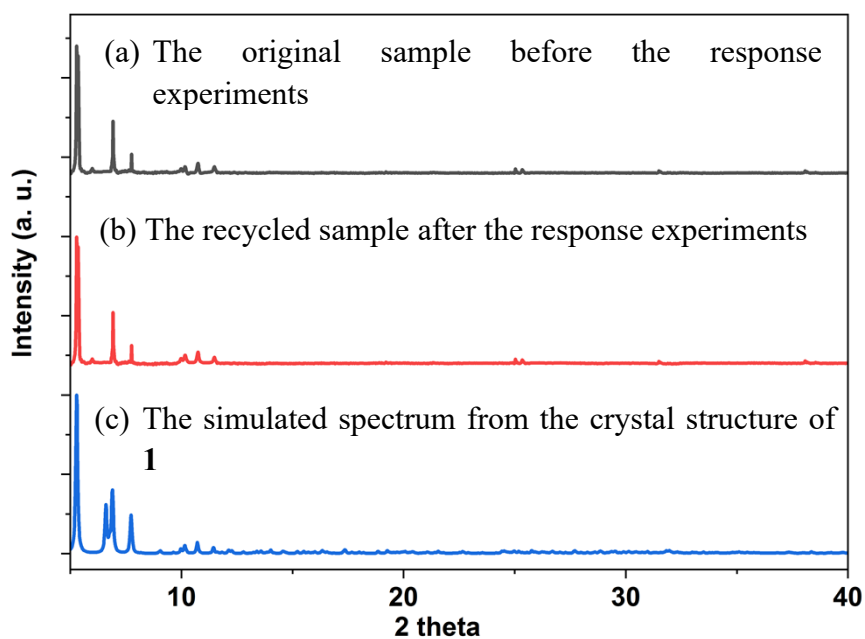

Figure S11. Powder XRD patterns of **1**.

## 15. UV-vis titration of **1** to the addition of VMA

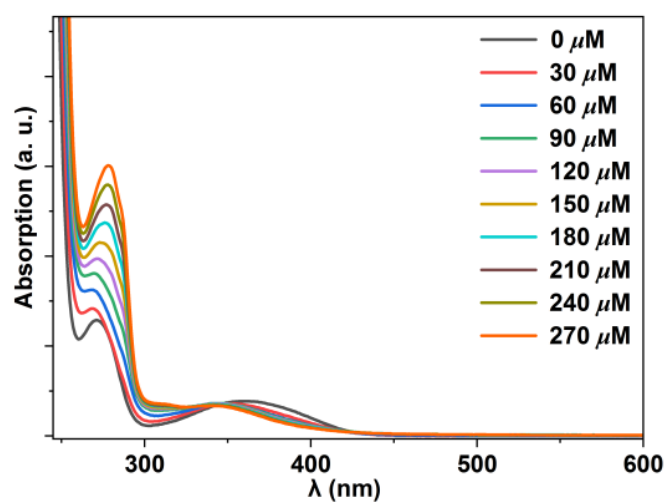

**Figure S12.** UV-vis titration of **1** (10  $\mu\text{M}$ ) with the addition of VMA in  $\text{CH}_3\text{CN}$ .

## 16. The emission spectrum of VMA at 77K

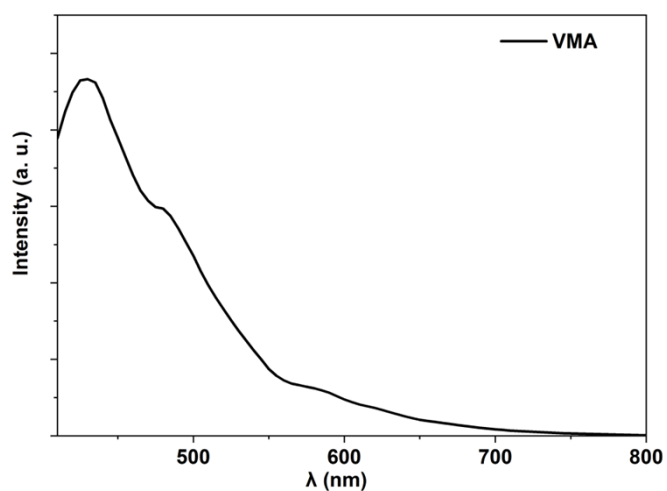

**Figure S13.** The emission spectrum of VMA at 77K.

## 17. UV-vis absorption spectra of VMA and urinary components

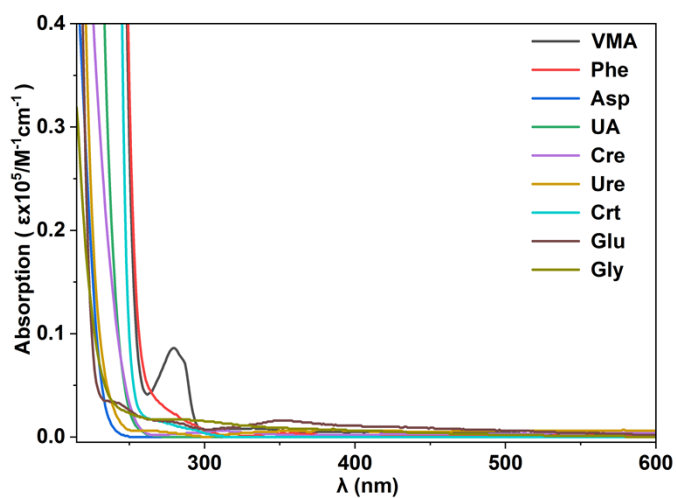

**Figure S14.** UV-vis absorption spectra of VMA and urinary components (10  $\mu$ M) in CH<sub>3</sub>CN.

## 18. X-Ray Crystallography

Data were collected on a Smart APEX CCD diffractometer with graphite monochromated Mo-K $\alpha$  radiation ( $\lambda = 0.71073$  Å) at 190 K. The data set was corrected for absorption based on multiple scans and reduced using standard methods. Data reduction was performed using DENZO-SMN.<sup>1</sup> The structure was solved by Olex2 program. Coordinates of the non-hydrogen atoms were refined anisotropically, while hydrogen atoms were included in the calculation isotropically but not refined. Neutral atom scattering factors were taken from Cromer and Waber.<sup>2</sup> Crystallographic data for **1** (CCDC reference number 2371789) are presented in Table S2, and selected bond lengths and angles are given in Table S3. See <http://www.rsc.org/suppdata/cc/> for crystallographic data in CIF format.

1. DENZO-SMN. (1997). Otwinowski, Z.; Minor, W. *Methods in Enzymology*, 276: *Macromolecular Crystallography, Part A*, 307 – 326, Carter, C. W. J.; Simon, M. I.; Sweet, R. M. Editors, Academic Press.
2. Cromer, D. T.; Waber, J. T. *International Tables for X-Ray Crystallography*, Kynoch Press, Birmingham, vol. 4, 1974, Table 2.2A.

**Table S2.** Crystal data and structure refinement for **1**.

|                          | <b>1</b>                         |
|--------------------------|----------------------------------|
| Formula                  | $C_{114}H_{154}N_4Tb_{14}O_{86}$ |
| Fw                       | 5181.28                          |
| Crystal system           | monoclinic                       |
| Space group              | $C2/c$                           |
| $a$ [Å]                  | 33.4177(5)                       |
| $b$ [Å]                  | 14.6058(3)                       |
| $c$ [Å]                  | 43.1667(6)                       |
| $\alpha$ [deg]           | 90.00                            |
| $\beta$ [deg]            | 91.3630(10)                      |
| $\gamma$ [deg]           | 90.00                            |
| $V$ [Å <sup>3</sup> ]    | 21063.4(6)                       |
| $d$ [g/cm <sup>3</sup> ] | 1.634                            |

|                                                                          |                |
|--------------------------------------------------------------------------|----------------|
| <i>Z</i>                                                                 | 4              |
| <i>T</i> [K]                                                             | 190            |
| F(000)                                                                   | 9856           |
| $\mu$ , mm <sup>-1</sup>                                                 | 4.707          |
| $\theta$ rang, deg                                                       | 1.798-25.000   |
| reflns meads                                                             | 86704          |
| reflns used                                                              | 18485          |
| params                                                                   | 946            |
| R1 <sup>a</sup> , wR2 <sup>a</sup> [ <i>I</i> > 2 $\sigma$ ( <i>I</i> )] | 0.0422, 0.1084 |
| R1, wR2 (all data)                                                       | 0.0582, 0.1149 |
| Quality of fit                                                           | 1.037          |

<sup>a</sup> R1 =  $\frac{\sum |F_o| - |F_c| \sum |F_o|}{\sum |F_o|}$ . wR2 =  $[\frac{\sum w[(F_o^2 - F_c^2)^2]}{\sum [w(F_o^2)^2]}]^{1/2}$ .  
 $w = 1/[\sigma^2(F_o^2) + (0.075P)^2]$ , where  $P = [\max(F_o^2, 0) + 2F_c^2]/3$ .

**Table S3.** Selected Bond Lengths (Å) and angles (°) for **1**.

|               |          |               |          |
|---------------|----------|---------------|----------|
| Tb(1)-O(1)    | 2.455(6) | Tb(2)-O(41)   | 2.491(5) |
| Tb(1)-O(2)    | 2.467(5) | Tb(3)-O(10)#1 | 2.472(4) |
| Tb(1)-O(3)    | 2.434(5) | Tb(3)-O(11)   | 2.378(4) |
| Tb(1)-O(5)    | 2.459(5) | Tb(3)-O(14)   | 2.364(4) |
| Tb(1)-O(6)    | 2.591(4) | Tb(3)-O(18)#1 | 2.625(4) |
| Tb(1)-O(7)    | 2.363(5) | Tb(3)-O(19)   | 2.397(4) |
| Tb(1)-O(9)    | 2.392(4) | Tb(3)-O(19)#1 | 2.536(4) |
| Tb(1)-O(39)#1 | 2.583(4) | Tb(3)-O(23)   | 2.479(5) |
| Tb(1)-O(40)#1 | 2.490(5) | Tb(3)-O(24)   | 2.572(4) |
| Tb(2)-O(6)    | 2.458(4) | Tb(3)-O(25)   | 2.334(4) |
| Tb(2)-O(8)    | 2.338(5) | Tb(4)-O(12)   | 2.515(4) |
| Tb(2)-O(9)    | 2.533(4) | Tb(4)-O(13)   | 2.524(5) |
| Tb(2)-O(11)   | 2.486(4) | Tb(4)-O(14)   | 2.391(4) |
| Tb(2)-O(12)   | 2.441(4) | Tb(4)-O(16)   | 2.390(4) |
| Tb(2)-O(14)   | 2.507(4) | Tb(4)-O(17)   | 2.649(5) |
| Tb(2)-O(15)   | 2.479(5) | Tb(4)-O(18)#1 | 2.497(4) |
| Tb(2)-O(16)   | 2.445(4) | Tb(4)-O(20)   | 2.603(4) |



|                    |            |                       |            |
|--------------------|------------|-----------------------|------------|
| Tb(4)-O(21)        | 2.347(4)   | O(5)-Tb(1)-O(6)       | 50.95(15)  |
| Tb(4)-O(37)        | 2.373(4)   | O(5)-Tb(1)-O(39)#1    | 129.08(18) |
| Tb(5)-O(3)#1       | 2.481(4)   | O(5)-Tb(1)-O(40)#1    | 82.14(18)  |
| Tb(5)-O(4)#1       | 2.503(5)   | O(7)-Tb(1)-O(1)       | 77.2(2)    |
| Tb(5)-O(10)#1      | 2.679(4)   | O(7)-Tb(1)-O(2)       | 127.4(2)   |
| Tb(5)-O(24)        | 2.501(4)   | O(7)-Tb(1)-O(3)       | 82.35(16)  |
| Tb(5)-O(25)        | 2.423(4)   | O(7)-Tb(1)-O(5)       | 85.45(18)  |
| Tb(5)-O(26)        | 2.531(4)   | O(7)-Tb(1)-O(6)       | 77.05(15)  |
| Tb(5)-O(31)        | 2.388(4)   | O(7)-Tb(1)-O(9)       | 82.33(15)  |
| Tb(5)-O(33)        | 2.345(4)   | O(7)-Tb(1)-O(39)#1    | 144.82(16) |
| Tb(5)-O(39)        | 2.418(5)   | O(7)-Tb(1)-O(40)#1    | 149.74(16) |
| Tb(6)-O(20)        | 2.455(4)   | O(9)-Tb(1)-O(1)       | 147.5(2)   |
| Tb(6)-O(21)        | 2.728(5)   | O(9)-Tb(1)-O(2)       | 149.16(19) |
| Tb(6)-O(22)        | 2.475(5)   | O(9)-Tb(1)-O(3)       | 73.70(15)  |
| Tb(6)-O(27)        | 2.345(4)   | O(9)-Tb(1)-O(5)       | 116.85(16) |
| Tb(6)-O(35)        | 2.503(5)   | O(9)-Tb(1)-O(6)       | 65.93(13)  |
| Tb(6)-O(36)        | 2.451(5)   | O(9)-Tb(1)-O(39)#1    | 76.03(13)  |
| Tb(6)-O(37)        | 2.407(4)   | O(9)-Tb(1)-O(40)#1    | 78.92(16)  |
| Tb(6)-N(1)         | 2.578(5)   | O(39)#1-Tb(1)-O(6)    | 117.13(15) |
| Tb(6)-N(2)         | 2.525(6)   | O(40)#1-Tb(1)-O(6)    | 73.68(15)  |
| Tb(7)-O(26)        | 2.380(4)   | O(40)#1-Tb(1)-O(39)#1 | 50.57(15)  |
| Tb(7)-O(27)        | 2.395(4)   | O(6)-Tb(2)-O(9)       | 65.94(13)  |
| Tb(7)-O(28)        | 2.613(5)   | O(6)-Tb(2)-O(11)      | 97.26(13)  |
| Tb(7)-O(29)        | 2.445(4)   | O(6)-Tb(2)-O(14)      | 148.33(15) |
| Tb(7)-O(30)        | 2.411(5)   | O(6)-Tb(2)-O(15)      | 76.44(14)  |
| Tb(7)-O(31)        | 2.691(5)   | O(6)-Tb(2)-O(41)      | 74.50(16)  |
| Tb(7)-O(32)        | 2.469(5)   | O(8)-Tb(2)-O(6)       | 75.51(16)  |
| Tb(7)-O(34)        | 2.402(5)   | O(8)-Tb(2)-O(9)       | 81.29(15)  |
| Tb(7)-O(35)        | 2.469(5)   | O(8)-Tb(2)-O(11)      | 129.10(15) |
| O(1)-Tb(1)-O(2)    | 52.5(2)    | O(8)-Tb(2)-O(12)      | 78.26(16)  |
| O(1)-Tb(1)-O(5)    | 86.6(2)    | O(8)-Tb(2)-O(14)      | 136.05(14) |
| O(1)-Tb(1)-O(6)    | 131.4(2)   | O(8)-Tb(2)-O(15)      | 78.93(18)  |
| O(1)-Tb(1)-O(39)#1 | 107.6(2)   | O(8)-Tb(2)-O(16)      | 75.69(15)  |
| O(1)-Tb(1)-O(40)#1 | 129.1(2)   | O(8)-Tb(2)-O(41)      | 143.55(16) |
| O(2)-Tb(1)-O(6)    | 123.3(2)   | O(11)-Tb(2)-O(9)      | 51.41(13)  |
| O(2)-Tb(1)-O(39)#1 | 73.96(17)  | O(11)-Tb(2)-O(14)     | 66.32(12)  |
| O(2)-Tb(1)-O(40)#1 | 76.7(2)    | O(11)-Tb(2)-O(41)     | 75.17(15)  |
| O(3)-Tb(1)-O(1)    | 78.7(2)    | O(12)-Tb(2)-O(6)      | 134.23(15) |
| O(3)-Tb(1)-O(2)    | 99.7(2)    | O(12)-Tb(2)-O(9)      | 73.55(13)  |
| O(3)-Tb(1)-O(5)    | 162.64(18) | O(12)-Tb(2)-O(11)     | 71.80(14)  |
| O(3)-Tb(1)-O(6)    | 136.50(14) | O(12)-Tb(2)-O(14)     | 68.53(14)  |
| O(3)-Tb(1)-O(39)#1 | 65.22(15)  | O(12)-Tb(2)-O(15)     | 133.46(15) |
| O(3)-Tb(1)-O(40)#1 | 114.33(16) | O(12)-Tb(2)-O(16)     | 67.36(14)  |
| O(5)-Tb(1)-O(2)    | 78.1(2)    | O(12)-Tb(2)-O(41)     | 138.14(15) |

|                       |            |                      |            |
|-----------------------|------------|----------------------|------------|
| O(14)-Tb(2)-O(9)      | 114.14(12) | O(25)-Tb(3)-O(18)#1  | 71.31(14)  |
| O(15)-Tb(2)-O(9)      | 140.78(14) | O(25)-Tb(3)-O(19)#1  | 113.25(14) |
| O(15)-Tb(2)-O(11)     | 149.43(16) | O(25)-Tb(3)-O(19)    | 139.07(13) |
| O(15)-Tb(2)-O(14)     | 103.56(14) | O(25)-Tb(3)-O(23)    | 91.00(15)  |
| O(15)-Tb(2)-O(41)     | 74.32(17)  | O(25)-Tb(3)-O(24)    | 67.71(13)  |
| O(16)-Tb(2)-O(6)      | 137.57(14) | O(12)-Tb(4)-O(13)    | 51.35(15)  |
| O(16)-Tb(2)-O(9)      | 137.69(15) | O(12)-Tb(4)-O(17)    | 91.24(15)  |
| O(16)-Tb(2)-O(11)     | 125.11(13) | O(12)-Tb(4)-O(20)    | 136.58(13) |
| O(16)-Tb(2)-O(14)     | 65.53(13)  | O(13)-Tb(4)-O(17)    | 68.20(17)  |
| O(16)-Tb(2)-O(15)     | 67.95(15)  | O(13)-Tb(4)-O(20)    | 129.33(15) |
| O(16)-Tb(2)-O(41)     | 115.11(16) | O(14)-Tb(4)-O(12)    | 69.15(14)  |
| O(41)-Tb(2)-O(9)      | 104.55(15) | O(14)-Tb(4)-O(13)    | 119.17(15) |
| O(41)-Tb(2)-O(14)     | 75.11(15)  | O(14)-Tb(4)-O(17)    | 130.18(15) |
| O(10)#1-Tb(3)-O(18)#1 | 84.55(14)  | O(14)-Tb(4)-O(18)#1  | 74.10(13)  |
| O(10)#1-Tb(3)-O(19)#1 | 76.23(13)  | O(14)-Tb(4)-O(20)    | 84.70(13)  |
| O(10)#1-Tb(3)-O(23)   | 114.72(15) | O(16)-Tb(4)-O(12)    | 67.00(14)  |
| O(10)#1-Tb(3)-O(24)   | 64.15(14)  | O(16)-Tb(4)-O(13)    | 96.10(17)  |
| O(11)-Tb(3)-O(10)#1   | 139.40(13) | O(16)-Tb(4)-O(14)    | 68.20(14)  |
| O(11)-Tb(3)-O(18)#1   | 94.17(14)  | O(16)-Tb(4)-O(17)    | 61.98(16)  |
| O(11)-Tb(3)-O(19)     | 72.45(13)  | O(16)-Tb(4)-O(18)#1  | 130.39(13) |
| O(11)-Tb(3)-O(19)#1   | 72.38(13)  | O(16)-Tb(4)-O(20)    | 134.49(15) |
| O(11)-Tb(3)-O(23)     | 87.14(15)  | O(18)#1-Tb(4)-O(12)  | 70.20(13)  |
| O(11)-Tb(3)-O(24)     | 130.72(14) | O(18)#1-Tb(4)-O(13)  | 75.17(16)  |
| O(14)-Tb(3)-O(10)#1   | 144.57(12) | O(18)#1-Tb(4)-O(17)  | 142.78(16) |
| O(14)-Tb(3)-O(11)     | 70.33(13)  | O(18)#1-Tb(4)-O(20)  | 69.57(13)  |
| O(14)-Tb(3)-O(18)#1   | 72.17(13)  | O(20)-Tb(4)-O(17)    | 131.39(14) |
| O(14)-Tb(3)-O(19)     | 140.26(13) | O(21)-Tb(4)-O(12)    | 134.18(17) |
| O(14)-Tb(3)-O(19)#1   | 105.98(13) | O(21)-Tb(4)-O(13)    | 83.09(17)  |
| O(14)-Tb(3)-O(23)     | 78.03(15)  | O(21)-Tb(4)-O(14)    | 150.99(16) |
| O(14)-Tb(3)-O(24)     | 115.52(14) | O(21)-Tb(4)-O(16)    | 131.65(15) |
| O(19)-Tb(3)-O(10)#1   | 75.06(13)  | O(21)-Tb(4)-O(17)    | 73.36(16)  |
| O(19)-Tb(3)-O(18)#1   | 124.38(13) | O(21)-Tb(4)-O(18)#1  | 96.33(14)  |
| O(19)#1-Tb(3)-O(18)#1 | 49.86(12)  | O(21)-Tb(4)-O(20)    | 66.35(15)  |
| O(19)-Tb(3)-O(19)#1   | 74.96(15)  | O(21)-Tb(4)-O(37)    | 76.48(16)  |
| O(19)-Tb(3)-O(23)     | 86.76(14)  | O(37)-Tb(4)-O(12)    | 145.25(14) |
| O(19)-Tb(3)-O(24)     | 79.64(13)  | O(37)-Tb(4)-O(13)    | 147.95(15) |
| O(19)#1-Tb(3)-O(24)   | 137.20(13) | O(37)-Tb(4)-O(14)    | 89.17(14)  |
| O(23)-Tb(3)-O(18)#1   | 147.74(14) | O(37)-Tb(4)-O(16)    | 80.01(14)  |
| O(23)-Tb(3)-O(19)#1   | 155.75(14) | O(37)-Tb(4)-O(17)    | 82.30(16)  |
| O(23)-Tb(3)-O(24)     | 50.94(15)  | O(37)-Tb(4)-O(18)#1  | 131.00(14) |
| O(24)-Tb(3)-O(18)#1   | 135.00(13) | O(37)-Tb(4)-O(20)    | 63.14(13)  |
| O(25)-Tb(3)-O(10)#1   | 68.93(13)  | O(3)#1-Tb(5)-O(4)#1  | 51.52(16)  |
| O(25)-Tb(3)-O(11)     | 148.30(13) | O(3)#1-Tb(5)-O(10)#1 | 86.90(14)  |
| O(25)-Tb(3)-O(14)     | 78.32(13)  | O(3)#1-Tb(5)-O(24)   | 106.42(14) |

|                      |            |                   |            |
|----------------------|------------|-------------------|------------|
| O(3)#1-Tb(5)-O(26)   | 136.12(14) | O(27)-Tb(6)-O(22) | 77.12(17)  |
| O(4)#1-Tb(5)-O(10)#1 | 111.28(15) | O(27)-Tb(6)-O(35) | 67.58(15)  |
| O(4)#1-Tb(5)-O(24)   | 78.93(16)  | O(27)-Tb(6)-O(36) | 94.50(17)  |
| O(4)#1-Tb(5)-O(26)   | 146.72(15) | O(27)-Tb(6)-O(37) | 146.97(14) |
| O(24)-Tb(5)-O(10)#1  | 62.20(13)  | O(27)-Tb(6)-N(1)  | 70.31(17)  |
| O(24)-Tb(5)-O(26)    | 115.76(13) | O(27)-Tb(6)-N(2)  | 141.81(16) |
| O(25)-Tb(5)-O(3)#1   | 150.28(15) | O(35)-Tb(6)-O(21) | 136.93(13) |
| O(25)-Tb(5)-O(4)#1   | 144.14(15) | O(35)-Tb(6)-N(1)  | 109.53(17) |
| O(25)-Tb(5)-O(10)#1  | 64.27(13)  | O(35)-Tb(6)-N(2)  | 129.51(18) |
| O(25)-Tb(5)-O(24)    | 67.60(13)  | O(36)-Tb(6)-O(20) | 120.04(16) |
| O(25)-Tb(5)-O(26)    | 51.38(13)  | O(36)-Tb(6)-O(21) | 144.06(17) |
| O(26)-Tb(5)-O(10)#1  | 101.87(13) | O(36)-Tb(6)-O(22) | 157.97(16) |
| O(31)-Tb(5)-O(3)#1   | 82.11(16)  | O(36)-Tb(6)-O(35) | 52.68(16)  |
| O(31)-Tb(5)-O(4)#1   | 85.28(17)  | O(36)-Tb(6)-N(1)  | 78.23(18)  |
| O(31)-Tb(5)-O(10)#1  | 147.45(15) | O(36)-Tb(6)-N(2)  | 80.1(2)    |
| O(31)-Tb(5)-O(24)    | 150.35(16) | O(37)-Tb(6)-O(20) | 64.99(13)  |
| O(31)-Tb(5)-O(25)    | 118.06(14) | O(37)-Tb(6)-O(21) | 69.03(14)  |
| O(31)-Tb(5)-O(26)    | 67.44(15)  | O(37)-Tb(6)-O(22) | 117.78(16) |
| O(31)-Tb(5)-O(39)    | 79.69(15)  | O(37)-Tb(6)-O(35) | 83.99(15)  |
| O(33)-Tb(5)-O(3)#1   | 126.32(17) | O(37)-Tb(6)-O(36) | 80.20(16)  |
| O(33)-Tb(5)-O(4)#1   | 77.55(16)  | O(37)-Tb(6)-N(1)  | 138.29(17) |
| O(33)-Tb(5)-O(10)#1  | 132.21(14) | O(37)-Tb(6)-N(2)  | 69.81(16)  |
| O(33)-Tb(5)-O(24)    | 74.73(15)  | N(1)-Tb(6)-O(21)  | 112.97(16) |
| O(33)-Tb(5)-O(25)    | 81.45(16)  | N(2)-Tb(6)-O(21)  | 72.31(17)  |
| O(33)-Tb(5)-O(26)    | 78.15(15)  | N(2)-Tb(6)-N(1)   | 71.58(19)  |
| O(33)-Tb(5)-O(31)    | 77.46(16)  | O(26)-Tb(7)-O(27) | 80.62(14)  |
| O(33)-Tb(5)-O(39)    | 150.96(14) | O(26)-Tb(7)-O(28) | 77.36(14)  |
| O(39)-Tb(5)-O(3)#1   | 67.07(16)  | O(26)-Tb(7)-O(29) | 148.11(17) |
| O(39)-Tb(5)-O(4)#1   | 118.17(16) | O(26)-Tb(7)-O(30) | 147.13(17) |
| O(39)-Tb(5)-O(10)#1  | 67.81(13)  | O(26)-Tb(7)-O(31) | 64.88(14)  |
| O(39)-Tb(5)-O(24)    | 129.92(14) | O(26)-Tb(7)-O(32) | 113.98(15) |
| O(39)-Tb(5)-O(25)    | 93.86(15)  | O(26)-Tb(7)-O(34) | 90.55(15)  |
| O(39)-Tb(5)-O(26)    | 76.67(14)  | O(26)-Tb(7)-O(35) | 72.06(14)  |
| O(20)-Tb(6)-O(21)    | 62.97(14)  | O(27)-Tb(7)-O(28) | 62.04(15)  |
| O(20)-Tb(6)-O(22)    | 80.86(15)  | O(27)-Tb(7)-O(29) | 74.88(16)  |
| O(20)-Tb(6)-O(35)    | 75.50(15)  |                   |            |
| O(20)-Tb(6)-N(1)     | 155.54(17) |                   |            |
| O(20)-Tb(6)-N(2)     | 124.65(16) |                   |            |
| O(22)-Tb(6)-O(21)    | 49.03(15)  |                   |            |
| O(22)-Tb(6)-O(35)    | 136.63(16) |                   |            |
| O(22)-Tb(6)-N(1)     | 79.76(18)  |                   |            |
| O(22)-Tb(6)-N(2)     | 93.83(19)  |                   |            |
| O(27)-Tb(6)-O(20)    | 90.91(14)  |                   |            |
| O(27)-Tb(6)-O(21)    | 121.41(15) |                   |            |

|                   |            |
|-------------------|------------|
| O(27)-Tb(7)-O(30) | 88.73(17)  |
| O(27)-Tb(7)-O(31) | 132.84(15) |
| O(27)-Tb(7)-O(32) | 138.90(16) |
| O(27)-Tb(7)-O(34) | 143.69(16) |
| O(27)-Tb(7)-O(35) | 67.39(15)  |
| O(28)-Tb(7)-O(31) | 79.09(14)  |
| O(29)-Tb(7)-O(28) | 73.27(17)  |
| O(29)-Tb(7)-O(31) | 120.01(17) |
| O(29)-Tb(7)-O(32) | 74.70(17)  |
| O(29)-Tb(7)-O(35) | 115.25(17) |
| O(30)-Tb(7)-O(28) | 124.38(16) |
| O(30)-Tb(7)-O(29) | 52.97(18)  |
| O(30)-Tb(7)-O(31) | 137.27(18) |
| O(30)-Tb(7)-O(32) | 94.44(19)  |
| O(30)-Tb(7)-O(35) | 75.13(17)  |
| O(32)-Tb(7)-O(28) | 83.09(17)  |
| O(32)-Tb(7)-O(31) | 49.60(14)  |
| O(34)-Tb(7)-O(28) | 149.85(15) |
| O(34)-Tb(7)-O(29) | 121.23(17) |
| O(34)-Tb(7)-O(30) | 79.81(17)  |
| O(34)-Tb(7)-O(31) | 70.78(15)  |
| O(34)-Tb(7)-O(32) | 76.74(18)  |
| O(34)-Tb(7)-O(35) | 76.36(16)  |
| O(35)-Tb(7)-O(28) | 123.95(16) |
| O(35)-Tb(7)-O(31) | 124.39(14) |
| O(35)-Tb(7)-O(32) | 152.47(17) |
